# Supplementary material for: The Greater the Contact, the Closer the Threat: The Influence of Contact with Nature on the Social Perception of Biodiversity Loss and the Effectiveness of Conservation Behaviours
Source: MDPI journal article supplement (doi:10.3390/su142416490), 2022-12-09
Supplement: s1 [file s1]

Archive with 1 entries (1 files):
- sustainability-1985592-supplementary.pdf
